# Supplementary material for: Field analysis of Cr(vi) in water samples by using a smartphone-based ultralong absorption path reflection colorimetric device
Source: Royal Society of Chemistry journal article supplement (doi:10.1039/d0nj05948j), 2021-01-01
Supplement: d0nj05948j1.pdf [file d0nj05948j1.pdf]

## Electronic Supporting Information

in

Field analysis Cr(VI) in water samples by a smartphone-based ultralong  
absorption path reflection colorimetric device

Xiaolan Chen, Cheng Ma, Qi Kang, Yuqin Chen<sup>\*</sup>, Dazhong Shen<sup>\*</sup>

College of Chemistry, Chemical Engineering and Materials Science, Collaborative Innovation  
Center of Functionalized Probes for Chemical Imaging in Universities of Shandong,  
Shandong Normal University, Jinan 250014, P. R. China

-----

\*Corresponding authors.

E-mail: [chenyuqin@sdu.edu.cn](mailto:chenyuqin@sdu.edu.cn) (Y.Chen); [dzshen@sdu.edu.cn](mailto:dzshen@sdu.edu.cn) (D. Shen).

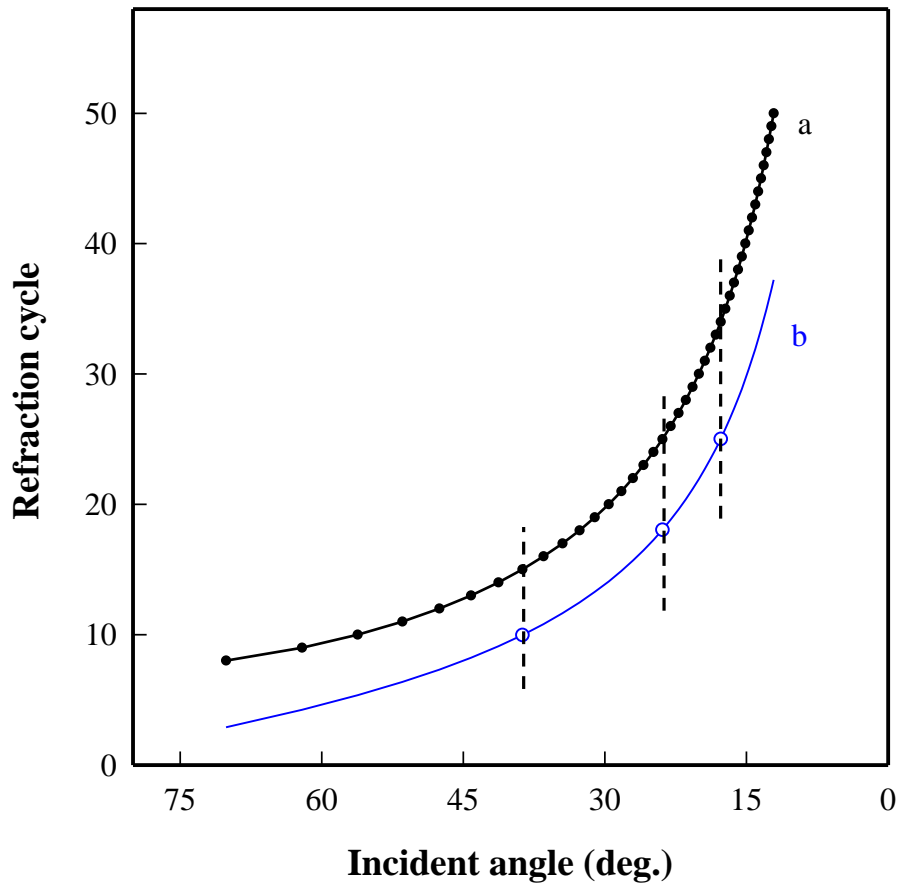

**Fig. S1** Theoretical dependence of the reflection cycle on incident angle according to eq. 4 by using  $n=1.33$ ,  $L=16$  cm,  $d=1$  cm. (a): in cell fill with pure water, (b) in empty cell. The three empty points in curve b occurred at the close incident angle used in curve a.

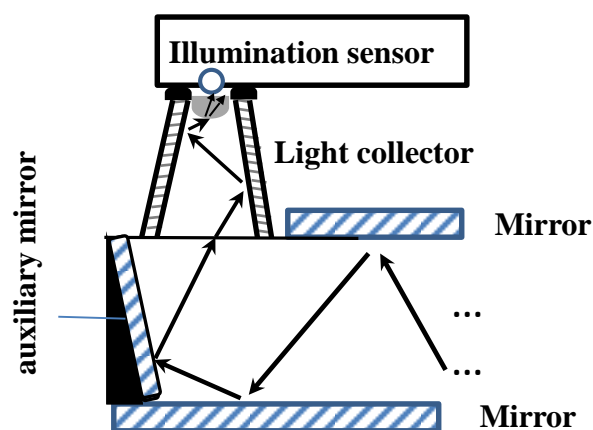

**Fig.S2** Schematic drawing of the light path for non-direct light beam guided by the auxiliary reflection mirror and light collector in the potable colorimetric device.

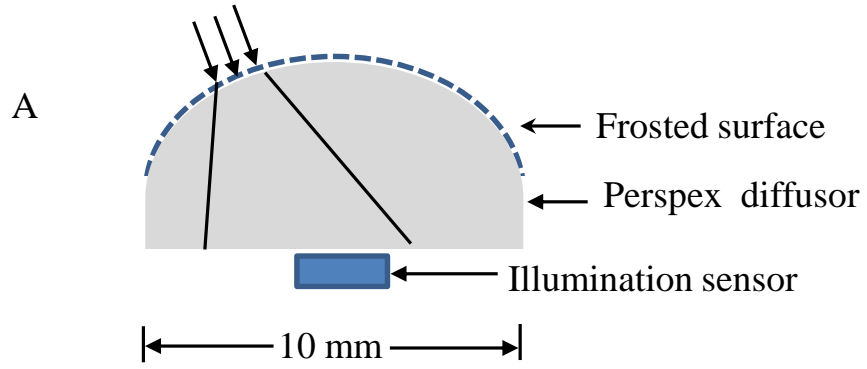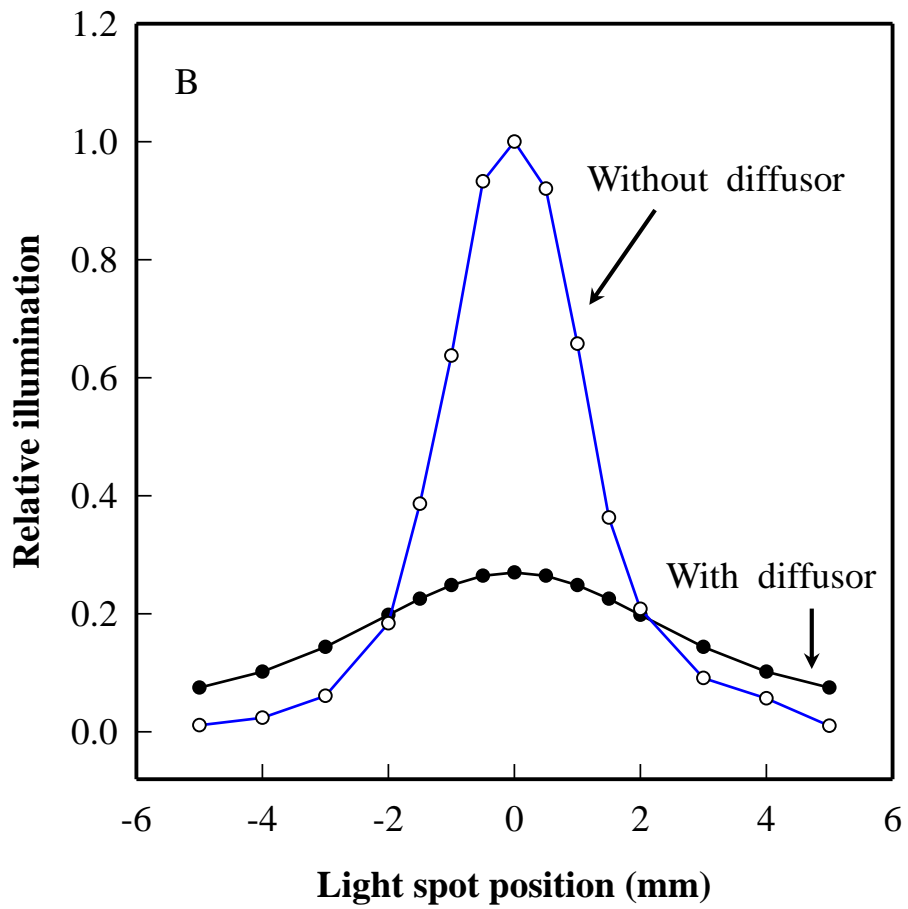

**Fig.S3** (A) Schematic drawing of the function of the diffuser, (B) influence of the light spot position on the readout of the illumination sensor.

**Table S1** Comparison of Cr(VI) concentration in water samples determined by lab spectrophotometer (b=10 cm) and smartphone-based colorimetric device (b=83 cm) on site.

| Samples               | Cr(VI) spiked<br>( $\mu\text{g L}^{-1}$ ) | Lab spectrophotometer<br>( $\mu\text{g L}^{-1}$ ) | Proposed portable device<br>( $\mu\text{g L}^{-1}$ ) |
|-----------------------|-------------------------------------------|---------------------------------------------------|------------------------------------------------------|
| No.1(Xiaoqing River)  | 0                                         | $3.22 \pm 0.34$                                   | $3.06 \pm 0.15$                                      |
|                       | 10.00                                     | $12.61 \pm 0.56$                                  | $13.34 \pm 0.37$                                     |
| No.2 (Xiaoqing River) | 0                                         | $4.63 \pm 0.39$                                   | $4.39 \pm 0.18$                                      |
|                       | 10.00                                     | $14.98 \pm 0.61$                                  | $13.92 \pm 0.40$                                     |
| No.3 (Xiaoqing River) | 0                                         | $6.63 \pm 0.43$                                   | $6.72 \pm 0.22$                                      |
|                       | 10.00                                     | $16.41 \pm 0.76$                                  | $17.04 \pm 0.39$                                     |
| No.4 (Moat)           | 0                                         | nd                                                | nd                                                   |
|                       | 10.00                                     | $10.26 \pm 0.41$                                  | $10.41 \pm 0.29$                                     |
| No.5 (Moat)           | 0                                         | nd                                                | nd                                                   |
|                       | 10.00                                     | $9.82 \pm 0.43$                                   | $9.73 \pm 0.31$                                      |
| No.6 (Moat)           | 0                                         | nd                                                | nd                                                   |
|                       | 10.00                                     | $9.68 \pm 0.37$                                   | $10.12 \pm 0.28$                                     |

\* nd: not detected
